# Supplementary material
Source: PubMed Central journal article supplement (PMC3208269)
Supplement: NIHMS328277-supplement-1_si_001.pdf [file NIHMS328277-supplement-1_si_001.pdf]

Supporting information for:

Uridine phosphorylase from *Trypanosoma cruzi*: kinetic and chemical mechanisms<sup>†</sup>

<sup>†</sup>This work was supported by NIH grants AI049512 and GM068036.

Rafael G. Silva and Vern L. Schramm\*

Department of Biochemistry, Albert Einstein College of Medicine of Yeshiva University, 1300 Morris  
Park Ave, Bronx, NY 10461 USA

\*To whom correspondence should be addressed: [vern@aecom.yu.edu](mailto:vern@aecom.yu.edu), phone: 718 430 28 13, Fax: 718  
430 8565

## Stationary-point transition structure coordinates with arsenate as nucleophile

opt=(calcfc,ts,noeigentest,nofreeze) freq rb3lyp/6-31g(d,p)

Sum of electronic and thermal Free Energies= -3446.129576

Thermal correction to Gibbs Free Energy= 0.193701

Sum of electronic and zero-point Energies= -3446.076398

|    |             |             |             |
|----|-------------|-------------|-------------|
| C  | 0.02359000  | 0.86308800  | 1.33446000  |
| C  | 0.41933900  | -0.15775100 | 0.26711400  |
| O  | 0.08277300  | 0.18777600  | -0.95500800 |
| C  | -0.42018900 | 1.57807800  | -1.01133100 |
| C  | -0.59345700 | 2.04964500  | 0.45783300  |
| C  | 0.54185400  | 2.38367600  | -1.86430400 |
| O  | 1.81479900  | 2.61285200  | -1.27055600 |
| O  | -1.90107400 | 2.39166000  | 0.76029600  |
| O  | -0.81562100 | 0.30842600  | 2.28458000  |
| N  | 2.41991200  | -0.16044700 | 0.09050000  |
| C  | 2.78501300  | -0.82229900 | -1.04002700 |
| C  | 4.01772700  | -1.35346700 | -1.30202800 |
| C  | 5.05553500  | -1.24940300 | -0.30617300 |
| N  | 4.61291200  | -0.58344800 | 0.84492000  |
| C  | 3.34659800  | -0.03124600 | 1.11017900  |
| O  | 3.15084400  | 0.53106200  | 2.18380200  |
| O  | 6.21555000  | -1.66903700 | -0.37708800 |
| O  | -3.27228200 | 0.74540500  | -0.57915600 |
| As | -3.24117700 | -0.92831000 | -0.21470900 |
| O  | -4.66547900 | -0.95806000 | 0.94068100  |
| O  | -3.55622300 | -1.97344100 | -1.45934200 |
| O  | -1.90477700 | -1.33685300 | 0.76743600  |
| H  | 0.09405100  | 3.36986000  | -2.03965900 |
| H  | 0.64956500  | 1.89229700  | -2.84730900 |
| H  | 2.09871100  | 1.77812500  | -0.86091400 |
| H  | -1.40819700 | 1.47894600  | -1.47342800 |
| H  | 0.37297500  | -1.22021600 | 0.46610300  |
| H  | 0.93163800  | 1.21759200  | 1.82972800  |
| H  | -1.44644900 | -0.32931700 | 1.75598400  |
| H  | 0.04080700  | 2.93289300  | 0.61781200  |
| H  | -2.51609600 | 1.67386600  | 0.33100600  |
| H  | 4.23578600  | -1.85718800 | -2.23485600 |
| H  | 1.98502100  | -0.89759800 | -1.77394800 |
| H  | -4.84100200 | -0.00516900 | 0.93756600  |
| H  | 5.28811600  | -0.47285800 | 1.58988400  |

## Stationary-point transition structure coordinates with phosphate as nucleophile

opt=(calcfc,ts,noeigentest,nofreeze) freq rb3lyp/6-31g(d,p)

Sum of electronic and thermal Free Energies= -1553.799969

Thermal correction to Gibbs Free Energy= 0.196954

Sum of electronic and zero-point Energies= -1553.747563

|   |             |             |             |
|---|-------------|-------------|-------------|
| C | -0.37782100 | 0.64923800  | 1.34252200  |
| C | 0.08254700  | -0.25425900 | 0.20050000  |
| O | -0.24363000 | 0.17980100  | -0.99375700 |
| C | -0.80632900 | 1.54636000  | -0.94051400 |
| C | -1.04508000 | 1.87315200  | 0.55825900  |
| C | 0.14436800  | 2.46511800  | -1.68664200 |
| O | 1.38812600  | 2.68885800  | -1.03358600 |
| O | -2.37792000 | 2.10470100  | 0.84682900  |
| O | -1.19737300 | -0.02934200 | 2.22401000  |
| N | 2.09386700  | -0.16393800 | 0.07059000  |
| C | 2.50752500  | -0.72229300 | -1.09810800 |
| C | 3.76658900  | -1.18080400 | -1.37258200 |
| C | 4.78050600  | -1.10944500 | -0.34957900 |
| N | 4.28897400  | -0.55079400 | 0.83815900  |
| C | 2.99546900  | -0.07279700 | 1.11630000  |
| O | 2.75637600  | 0.40011500  | 2.22369100  |
| O | 5.95863800  | -1.47414000 | -0.42670400 |
| O | -3.59458400 | 0.39511100  | -0.54792800 |
| O | -4.87033600 | -1.40364200 | 0.65937300  |
| O | -3.67557100 | -2.00910900 | -1.57353400 |
| O | -2.28585100 | -1.53110900 | 0.56501100  |
| H | -0.33967400 | 3.44470400  | -1.78694800 |
| H | 0.30041200  | 2.07016100  | -2.70605300 |
| H | 1.70043100  | 1.83050300  | -0.69986600 |
| H | -1.77268900 | 1.45237500  | -1.44440900 |
| H | 0.08125600  | -1.33137800 | 0.30755100  |
| H | 0.50481900  | 1.00701700  | 1.88041300  |
| H | -1.80517800 | -0.63741300 | 1.62944000  |
| H | -0.47178100 | 2.77528400  | 0.81530900  |
| H | -2.92916400 | 1.36108900  | 0.37034700  |
| H | 4.02321000  | -1.60327700 | -2.33544600 |
| H | 1.72519700  | -0.77484400 | -1.85290200 |
| H | -5.16650700 | -0.48966600 | 0.76448300  |
| H | 4.94515800  | -0.46861600 | 1.60353500  |
| P | -3.50833400 | -1.15789300 | -0.33832500 |
